# Supplementary material for: Correlation of neuroendocrine features with prognosis of non-small cell lung cancer
Source: PubMed Central journal article supplement (PMC5342116; doi:10.18632/oncotarget.12327), 2016-09-28
Supplement: oncotarget-07-71727-s001.pdf [file oncotarget-07-71727-s001.pdf]

## Correlation of neuroendocrine features with prognosis of non-small cell lung cancer

### Supplementary Materials

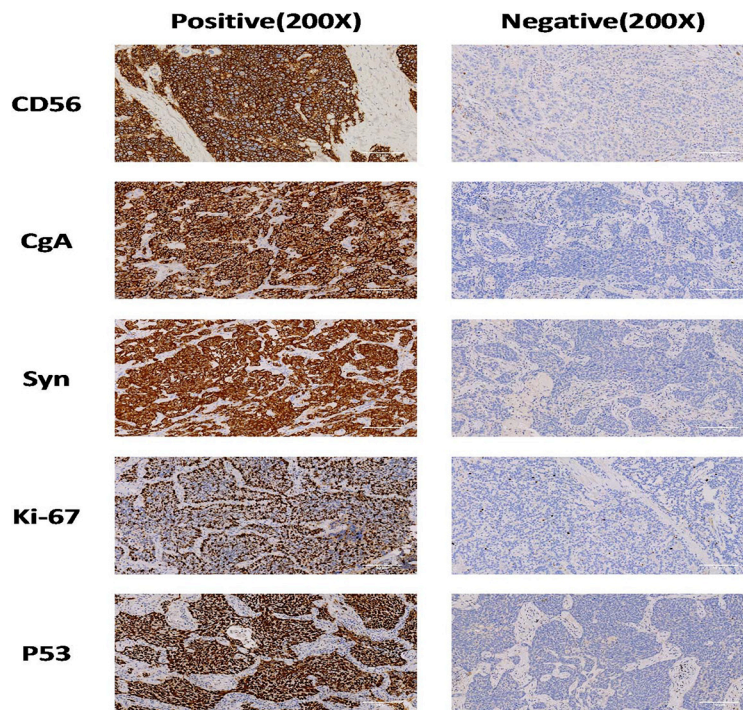

Supplementary Figure S1: Samples were stained by immunohistochemical method, and representative images of positive and negative staining were shown as indicated. Images were taken under microscope and magnified by 200× fold.
